# Supplementary material for: Inter-individual variability in performance benefits from repeated sprint training in hypoxia and associated training parameters
Source: Frontiers journal article supplement (doi:10.3389/fspor.2025.1524437), 2025-04-15
Supplement: Data_Sheet_1.pdf [file Data_Sheet_1.pdf]

## *Supplementary Material*

### 1 Supplementary Figures and Tables

#### 1.1 Supplementary Figure S1

Individual pre-post performance improvement

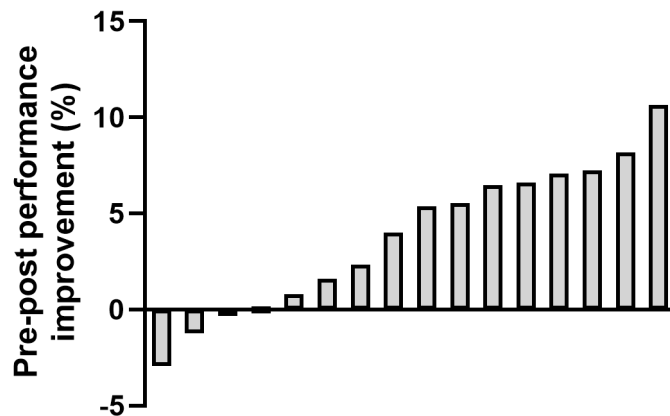

Each bar indicates individual values of pre-post performance improvement.

#### 1.2 Supplementary Table S1.

Characteristics of participants

|                          | Age (Year) | Weight (kg) | Height (m)  | Personal best records (s) |              |              |
|--------------------------|------------|-------------|-------------|---------------------------|--------------|--------------|
|                          |            |             |             | 100-m                     | 200-m        | 400-m        |
|                          |            |             |             | (n = 10)                  | (n = 6)      | (n = 8)      |
| Participants<br>(n = 16) | 20.2 ± 1.7 | 66.9 ± 7.2  | 1.74 ± 0.07 | 10.81 ± 0.26              | 21.55 ± 0.61 | 49.27 ± 1.56 |
| Range                    | 19-25      | 55.4-79.2   | 1.63-1.86   | 10.33-11.20               | 20.86-22.35  | 45.81-50.79  |

Values are means ± SD.
